# Supplementary material for: A rhodamine–TPE scaffold-based fluorescent probe for visualizing phosgene with a portable smartphone via test TLC strips
Source: Royal Society of Chemistry journal article supplement (doi:10.1039/d2nj01562e), 2022-01-01
Supplement: d2nj01562e1.pdf [file d2nj01562e1.pdf]

## Supporting Information

### A Rhodamine-TPE Scaffold-Based Fluorescent Probe for Visualizing Phosgene with a Portable Smartphone via Test TLC Strips

Shuai Yin, Shishen Zhang, and Yifeng Han\*

*Department of Chemistry, Zhejiang Sci-Tech University, Hangzhou, 310018, China.*

*E-mail: [zstuchem@gmail.com](mailto:zstuchem@gmail.com) (Yifeng Han); Tel: +86-751-86843550;*

## Contents

|                                                      |     |
|------------------------------------------------------|-----|
| Additional spectroscopic data.....                   | S3  |
| The characterization data of <b>TPE-RhodEA</b> ..... | S18 |
| References.....                                      | S21 |

### Additional spectroscopic data

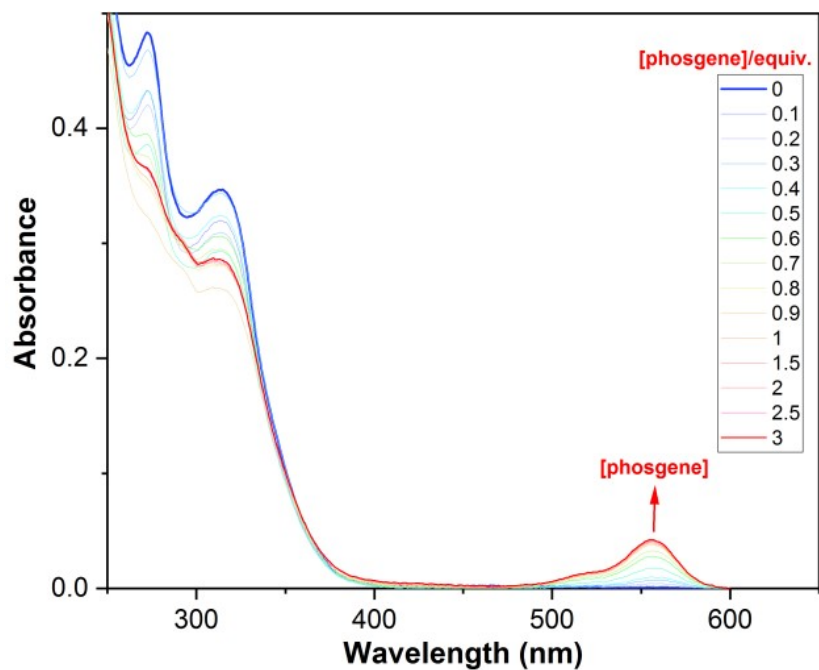

**Fig. S1** UV-Vis absorption spectra of TPE-RhodEA (10.0 μM) in CH<sub>3</sub>CN solution (containing 1% TEA) in the presence of different concentrations of phosgene (0-3.0 equiv.).

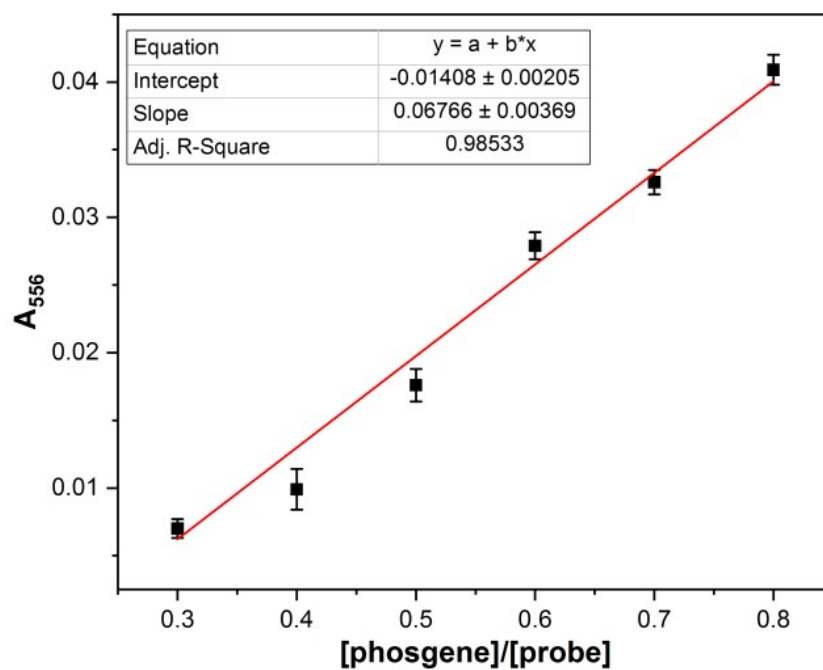

**Fig. S2** The absorbance of UV-Vis absorption spectra of **TPE-RhodEA** (10.0  $\mu\text{M}$ ) at 556 nm ( $A_{556}$ ) as a function of phosgene concentration (0.3-0.8 equiv.) in  $\text{CH}_3\text{CN}$  solution (containing 1% TEA).

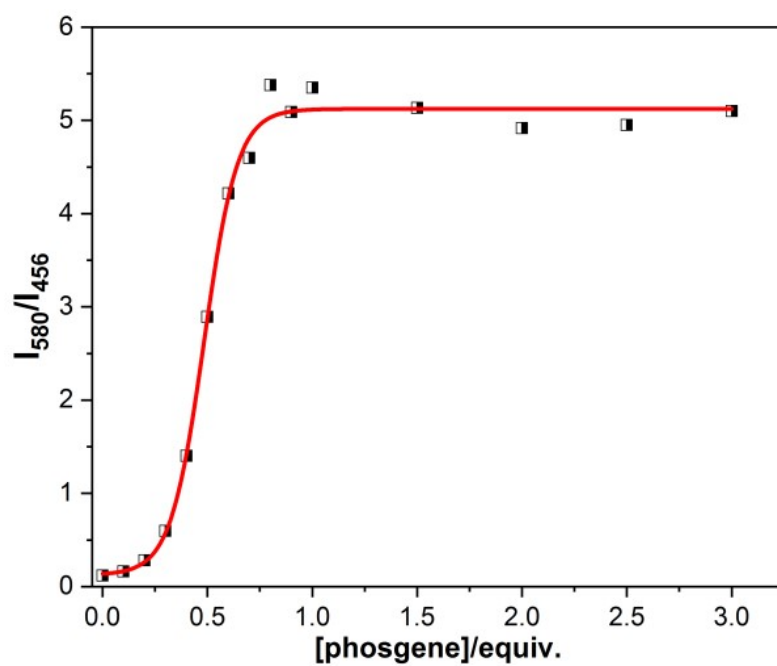

**Fig. S3** The ratio of the fluorescent intensity of **TPE-RhodEA** (10.0  $\mu$ M) at 456 nm ( $I_{456}$ ) and 580 nm ( $I_{580}$ ),  $I_{580}/I_{456}$ , as a function of phosgene concentration (0-3.0 equiv.) under the same condition as the phosgene titration.

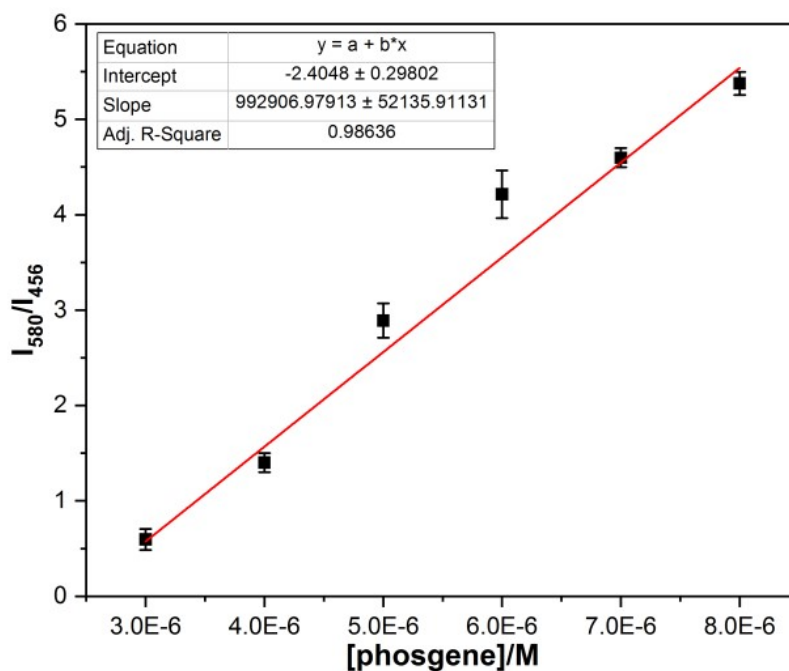

**Fig. S4** The change of the ratio of the fluorescent intensity of **TPE-RhodeA** at 456 nm and 580 nm,  $I_{580}/I_{456}$ , as a function of phosgene concentration (0.3-0.8 equiv.) under the same condition as the phosgene titration.

The detection limit (DL) of phosgene using **TPE-RhodeA** was determined from the following equation: <sup>1</sup>

$$DL = 3 \cdot \sigma / K$$

Where  $\sigma$  is the standard deviation of the blank solution; K is the slope of the calibration curve.

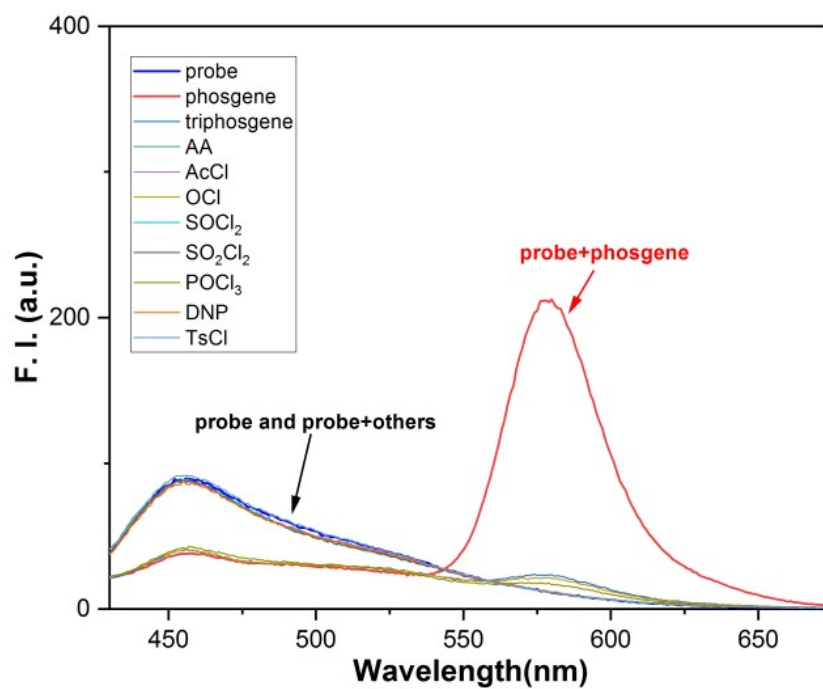

**Fig. S5** Fluorescence spectra of **TPE-RhodEA** (10.0  $\mu\text{M}$ ) before and after addition of various analytes (including acetic anhydride (AA), acetyl chloride (AcCl), oxalyl chloride (OCl), thionyl chloride ( $\text{SOCl}_2$ ), sulfone chloride ( $\text{SO}_2\text{Cl}_2$ ), phosphorus oxychloride ( $\text{POCl}_3$ ), diethyl chlorophosphate (DCP), *p*-toluenesulfonyl chloride (TsCl), triphosgene, and phosgene, ( in  $\text{CH}_3\text{CN}$  solution, containing 1% TEA,  $\lambda_{\text{ex}} = 400 \text{ nm}$ ).

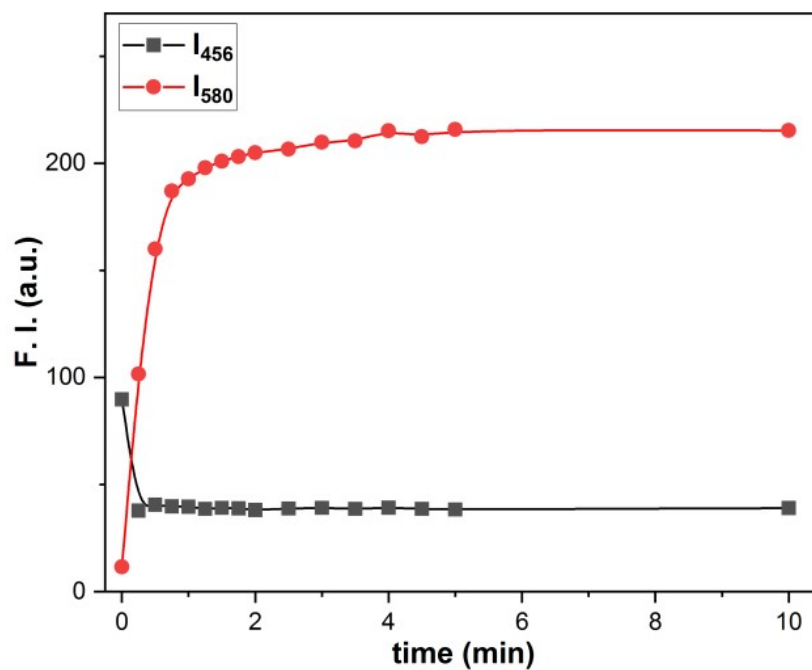

**Fig. S6** The change of the fluorescent intensity of TPE-RhodEA ( $10.0 \mu\text{M}$ ) in the present of 1 equiv. of phosgene at 456 nm ( $I_{456}$ ) and 580 nm ( $I_{580}$ ), respectively, as a function of reaction time (0-10 min) under the same condition as the phosgene titration.



**Table S1** The performance comparison of the probe with other reported phosgene sensors.

| Structures                                                                          | Response type | LOD      | Time (in solution) | Time (in gas phase) | Refs |
|-------------------------------------------------------------------------------------|---------------|----------|--------------------|---------------------|------|
| 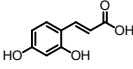   | off-on        | 18 nM    | -                  | -                   | 2    |
|    | ratiometric   | 0.14 ppm | 4 min              | 10 min              | 3    |
|    | ratiometric   | 27 nM    | 2 min              | 10 min              | 4    |
|    | ratiometric   | 0.14 μM  | 30 s               | 5 min               | 5    |
|    | ratiometric   | 5.3 nM   | 50 s               | 10 min              | 6    |
|   | ratiometric   | 6.7 nM   | 200 s              | 1 min               | 7    |
|  | ratiometric   | 12 nM    | 1.5 s              | 1 min               | 8    |
|  | off-on        | 0.3 nM   | 60 s               | 1 s                 | 9    |
|  | off-on        | 0.48 nM  | 20 min             | 20 min              | 10   |
|  | off-on        | 6.3 nM   | 15 min             | 5 min               | 11   |
|  | off-on        | 5.56 nM  | 1.5 min            | 10 min              | 12   |
|  | ratiometric   | 0.09 nM  | 20 s               | 1 min               | 13   |
|  | off-on        | 0.12 μM  | 1 min              | 10 s                | 14   |
|  | off-on        | 3.3 nM   | 30 s               | 10 min              | 15   |

|                                                                                     |             |                    |        |       |           |
|-------------------------------------------------------------------------------------|-------------|--------------------|--------|-------|-----------|
| 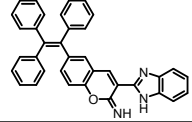   | ratiometric | 0.36 $\mu\text{M}$ | 6 s    | 2 min | 16        |
|    | ratiometric | 4.9 nM             | 12 min | 5 min | 17        |
|    | off-on      | 3 nM               | 30 s   | 5 min | 18        |
|    | ratiometric | 2.36 nM            | 2 min  | 30 s  | 19        |
|    | off-on      | 24 ppm             | 3 s    | 30 s  | 20        |
|   | off-on      | 1.2 nM             | 20 s   | 5 min | 21        |
|  | off-on      | 1.65 nM            | 200 s  | 5 min | 22        |
|  | ratiometric | 0.54 ppm           | 2 min  | 2 min | This work |

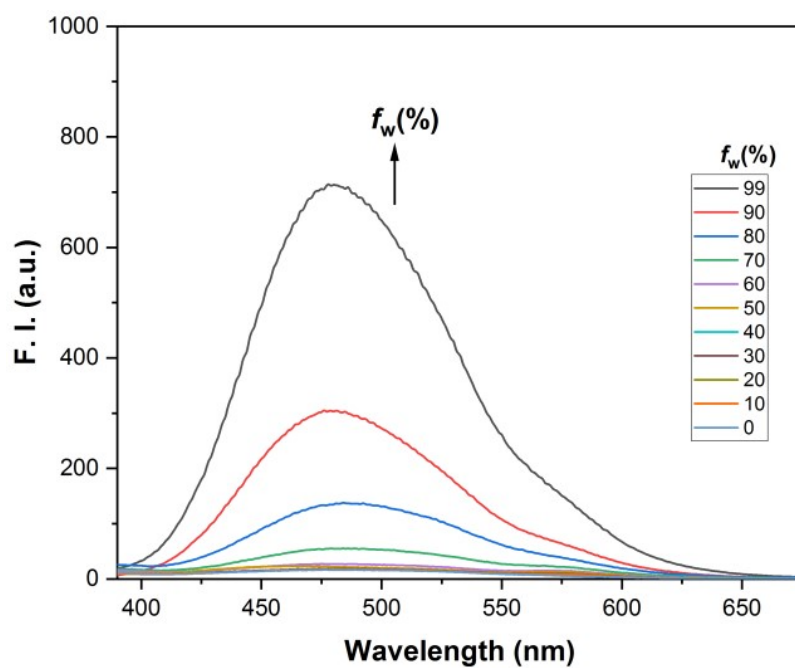

**Fig. S7** Fluorescence spectra of **TPE-RhodEA** in THF and THF/water mixtures with different water fractions ( $f_w\%$ );  $[\text{TPE-RhodEA}] = 10 \mu\text{M}$ ;  $\lambda_{\text{ex}} = 365 \text{ nm}$ .

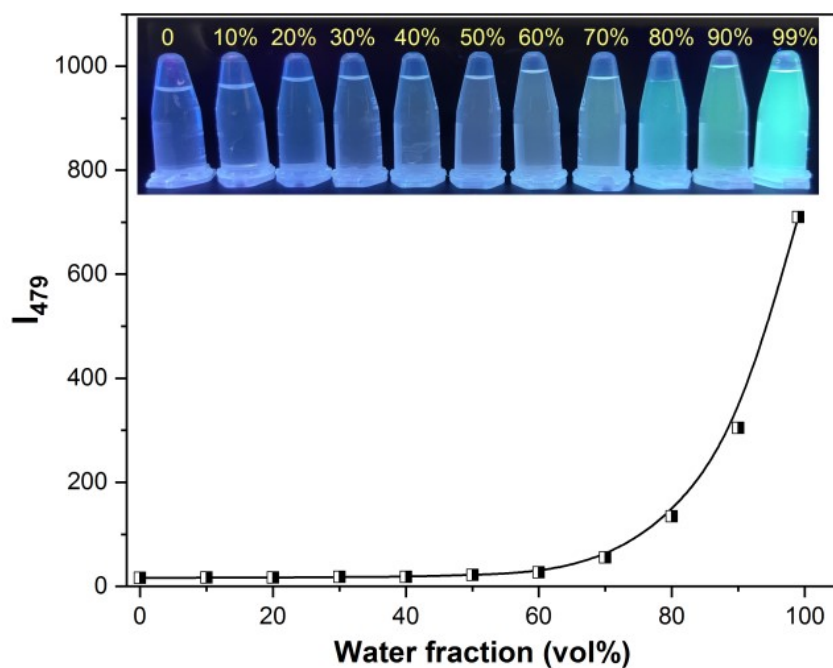

**Fig. S8** Plot of relative fluorescence intensity of **TPE-RhodEA** at 479 nm versus the solvent composition of THF/water mixture. Inset: Photographs of **TPE-RhodEA** in different water fractions of H<sub>2</sub>O/ THF (from 0 to 99%, v/v) taken under UV light (365 nm).

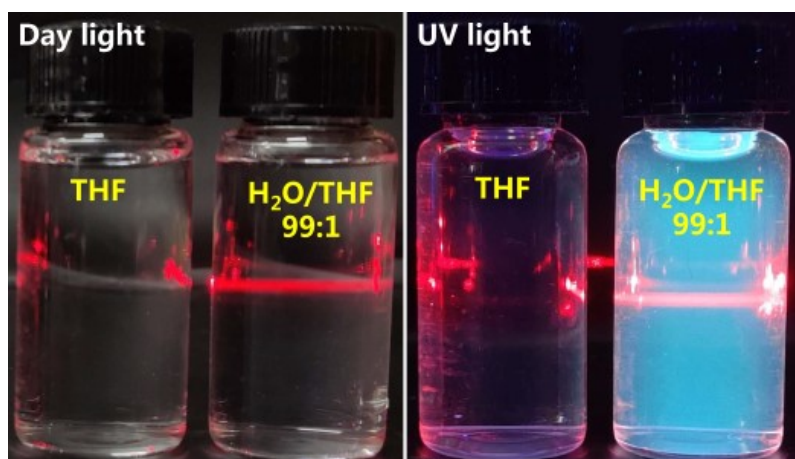

**Fig. S9** Tyndall effect test of TPE-RhodEA in THF and H<sub>2</sub>O/THF (99 : 1, v/v).

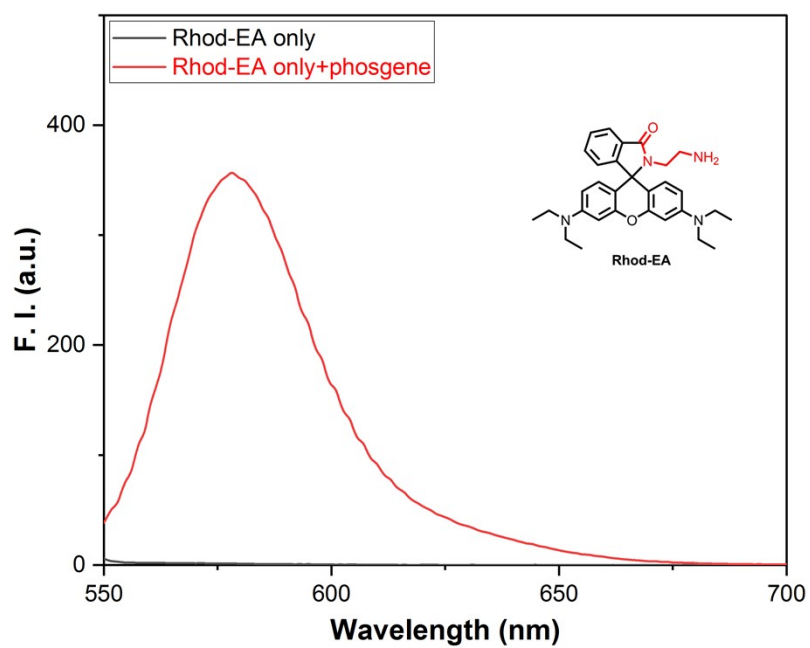

**Fig. S10** Fluorescence spectra of **Rhod-EA** (10.0  $\mu\text{M}$ ) in  $\text{CH}_3\text{CN}$  solution (containing 1% TEA)

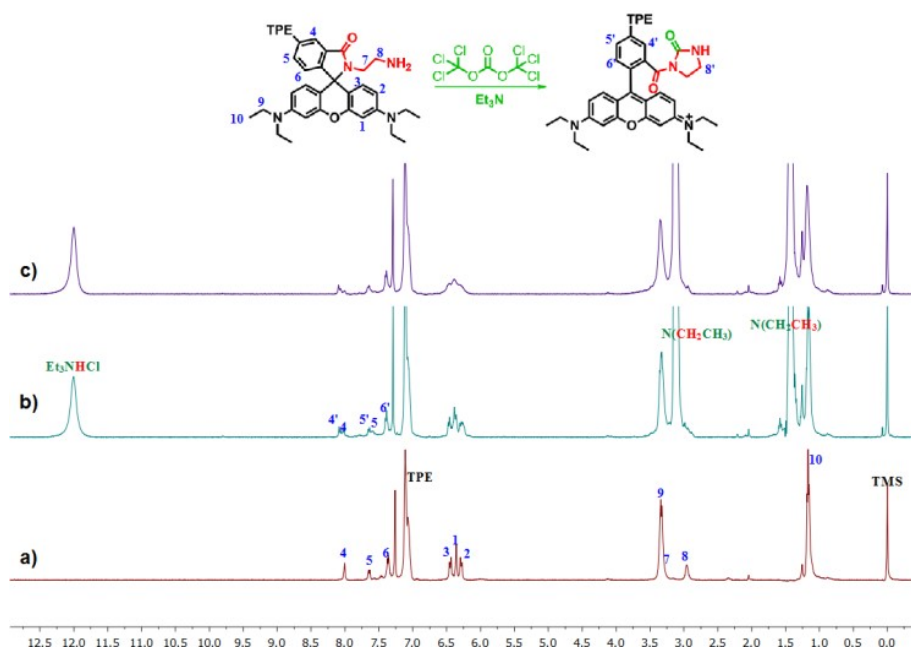

**Fig. S11** In situ <sup>1</sup>H NMR titration experiments of the probe in the presence of phosgene in CDCl<sub>3</sub>.  
a) The probe alone; b) Add 1 equivalent of phosgene to the probe solution after 1 minute; c) Add 1 equivalent of phosgene to the probe solution after 10 minutes.

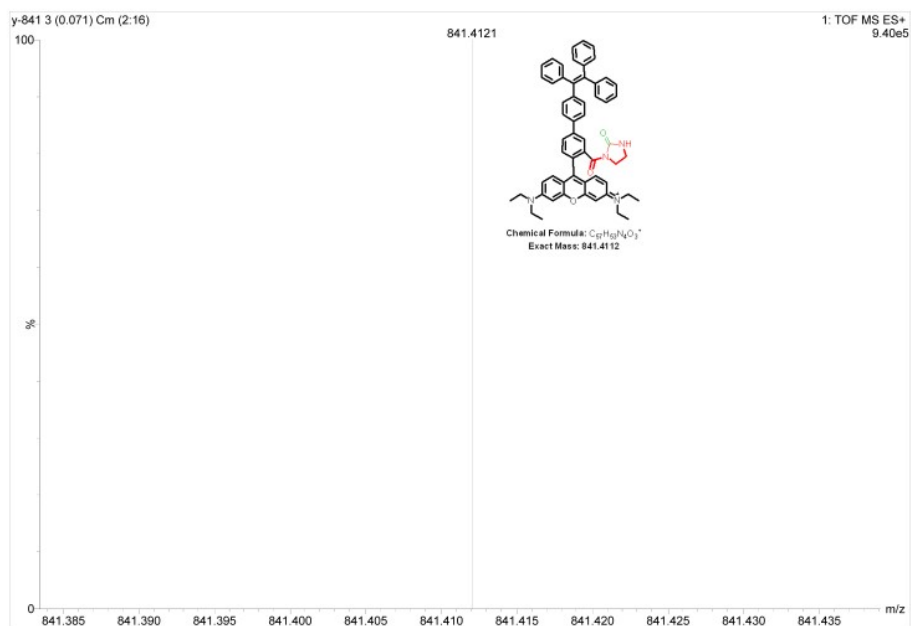

**Fig. S12** The HR-MS spectrum of TPE-RhodEA-phosgene mixture solution.



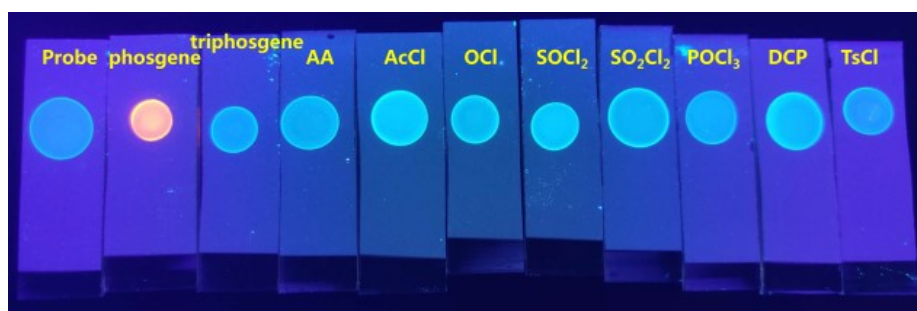

**Fig. S13** The probe-loaded TLC test strips response for various analytes (including acetic anhydride (AA), acetyl chloride (AcCl), oxalyl chloride (OCl), thionyl chloride (SOCl<sub>2</sub>), sulfone chloride (SO<sub>2</sub>Cl<sub>2</sub>), phosphorus oxychloride (POCl<sub>3</sub>), diethyl chlorophosphate (DCP), p-toluenesulfonyl chloride (TsCl), triphosgene, and phosgene) (the photo was taken using a smartphone under a 365 nm hand-held UV lamp).

## The characterization data of TPE-RhodEA

### <sup>1</sup>H NMR of 1 (RhodBr-EA)

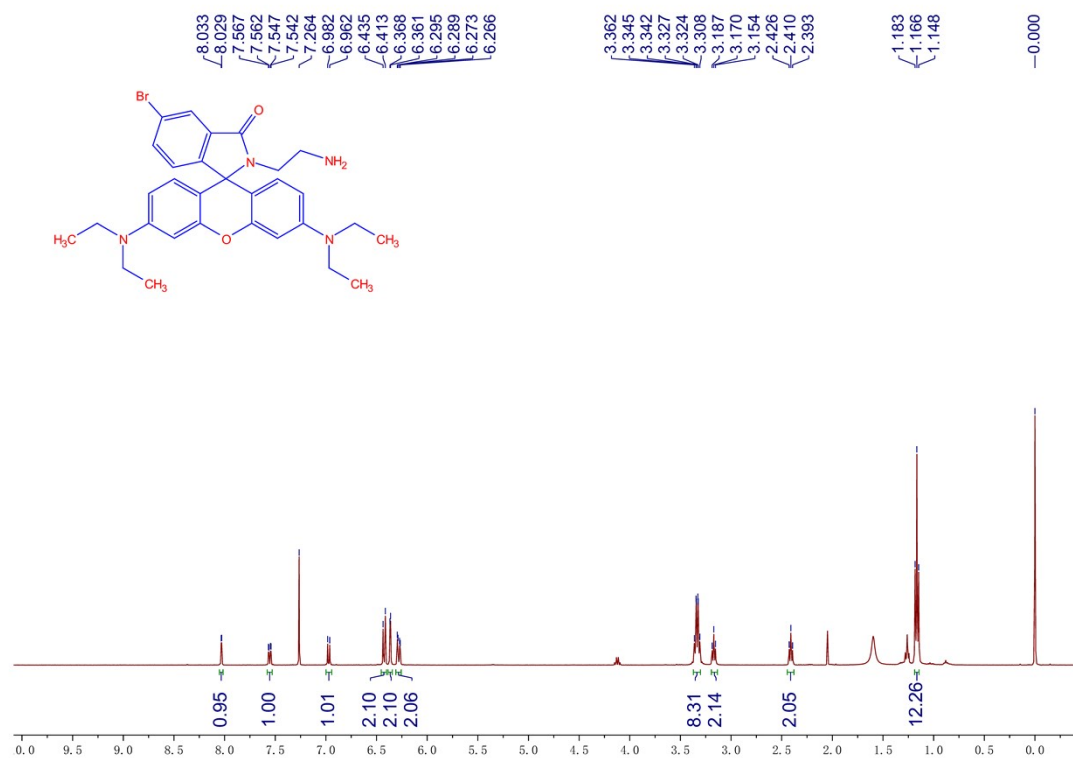

### <sup>1</sup>H NMR of 3 (4,4,5,5-tetramethyl-2-(4-(1,2,2-triphenylvinyl)phenyl)-1,3,2-dioxaborolane)

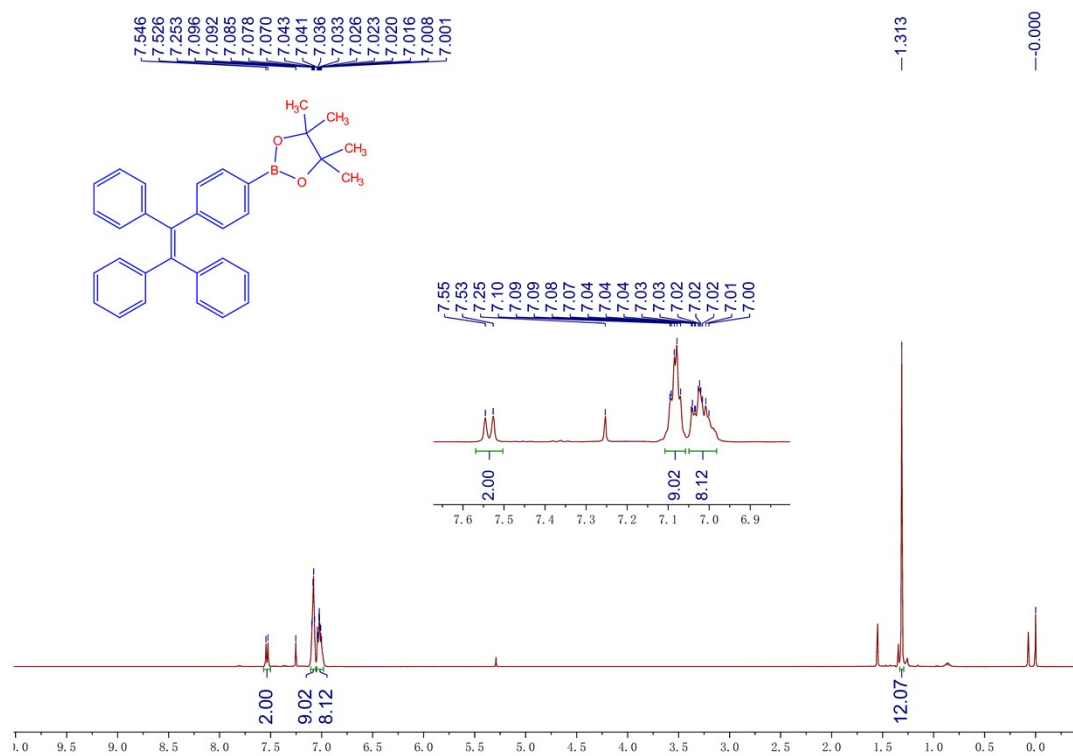

<sup>1</sup>H NMR of 4 (TPE-RhodEA)

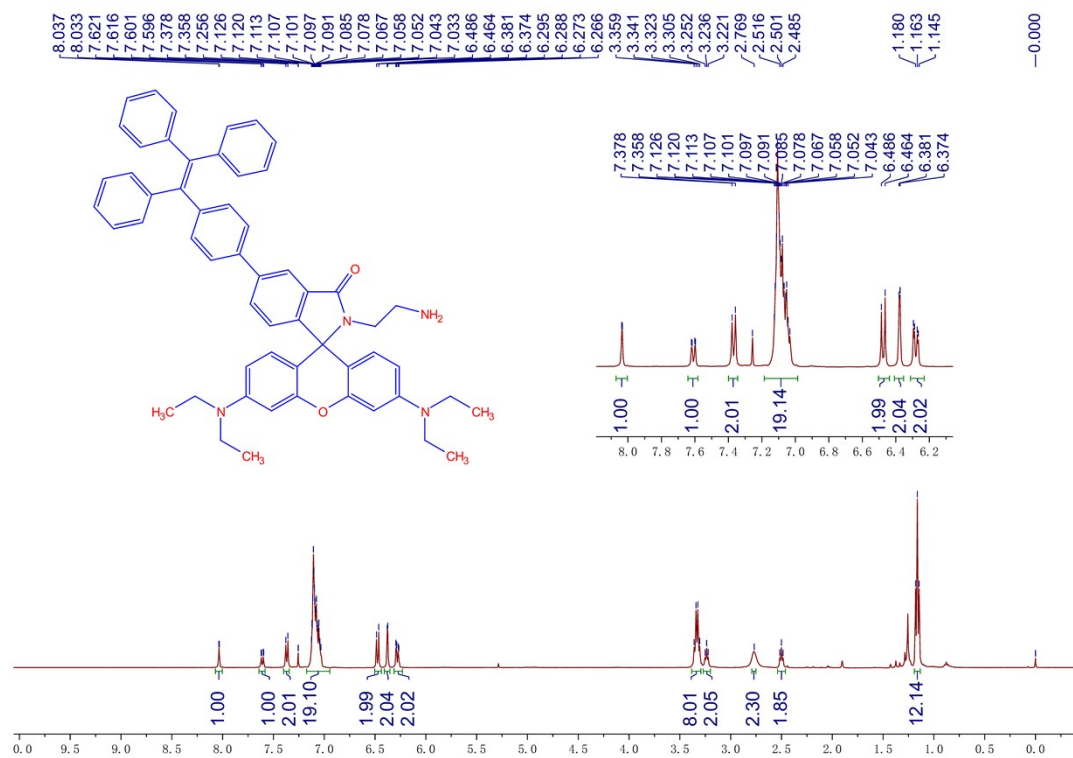

<sup>13</sup>C NMR of 4 (TPE-RhodEA)

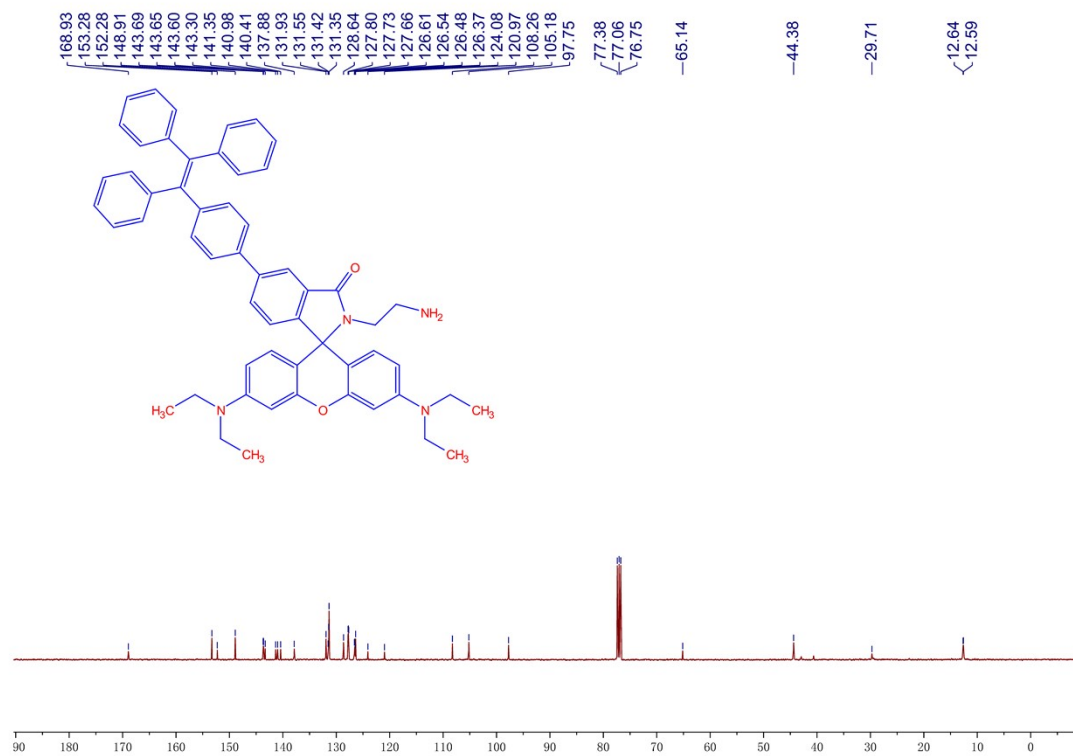

# HR-MS of 4 (TPE-RhodEA)

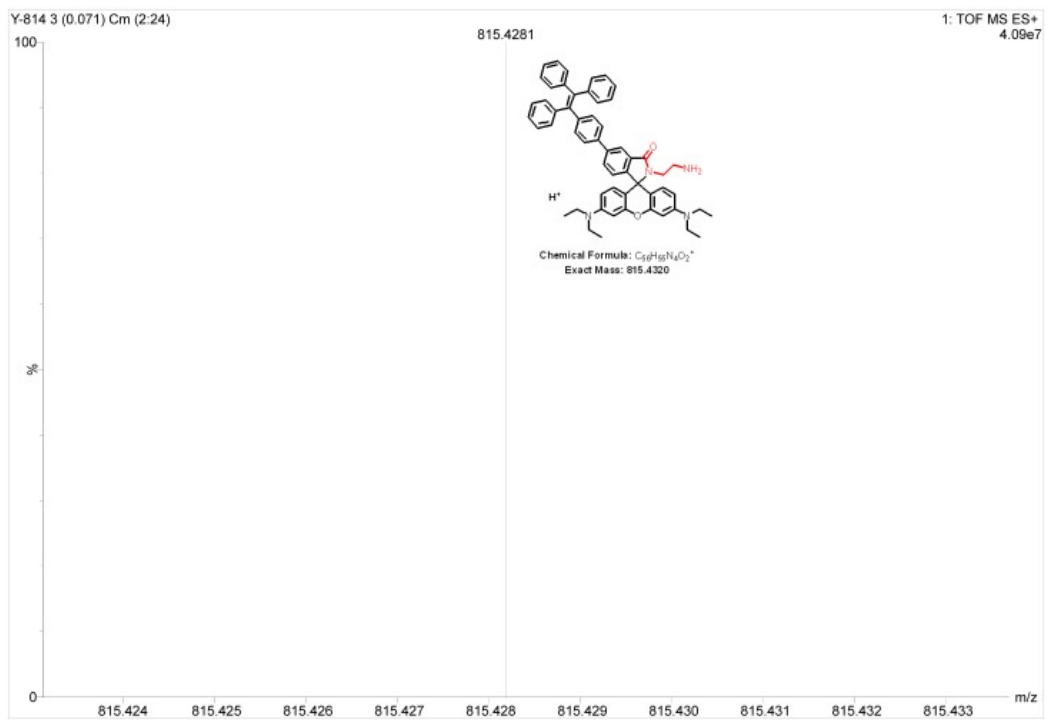

## References

- 1 (a) J. T. Yeh, P. Venkatesan and S. P. Wu, *New J. Chem.*, 2014, **38**, 6198-6204. (b) A. Roy, D. Kand, T. Saha and P. Talukdar, *Chem. Commun.*, 2014, **50**, 5510-5513.
- 2 P. Kundu, K. C. Hwang, *Anal. Chem.*, 2012, **84**, 4594-4597.
- 3 L. Chen, D. Wu, J. M. Kim, et al., *Anal. Chem.*, 2017, **89**, 12596-12601.
- 4 W. Feng, S. Gong, E. Zhou, et al., *Anal. Chim. Acta*, 2018, **1029**, 97-103.
- 5 C. Wu, H. Xu, Y. Li, et al., *Talanta*, 2019, **200**, 78-83.
- 6 Z. J. Li, W. J. Zhang, W. Z. Bi, et al., *RSC Adv.*, 2021, **11**, 10836-10841.
- 7 J. Y. Ni, D. L. Qian, R. Sun, et al., *Talanta*, 2022, **236**, 122826.
- 8 Y. Zhang, A. Peng, X. Jie, et al., *ACS Appl. Mater. Inter.*, 2017, **9**, 13920-13927.
- 9 S. L. Wang, C. L. Zhang, Q. H. Song, *J. Mater. Chem. C*, 2019, **7**, 1510-1517.
- 10 L. Bai, W. Feng, G. Feng, *Dyes Pigment.*, 2019, **163**, 483-488.
- 11 Y. L. Huang, W. Ye, Y. T. Su, et al., *Dyes Pigment.*, 2020, **173**, 107854-107860.
- 12 A. Gangopadhyay, S. S. Ali, A. K. Mahapatra, *ChemistrySelect*, 2019, **4**, 8968-8972.
- 13 P. Liu, N. Liu, C. Liu, et al., *Dyes Pigment.*, 2019, **163**, 489-495.
- 14 S. Paul, P. Ghosh, P. Roy, *New J. Chem.*, 2020, **44**, 5784-5791.
- 15 L. Yang, F. Wang, Z. Sun, et al., *Anal. Method.*, 2020, **12**, 3123-3129.
- 16 Q. Hu, Q. Huang, K. Liang, et al., *Dyes Pigment.*, 2020, **176**, 108229-108237.
- 17 Z. Xu, Y. Luo, Y. Hong, et al., *Spectrochim. Acta A: Mol. Biomol. Spectrosc.*, 2022, **269**, 120789-120795.
- 18 H. C. Xia, X. H. Xu, Q. H. Song, *ACS Sens.*, 2017, **2**, 178-182.
- 19 T. Cao, D. Gong, L. Zheng, et al., *Anal. Chim. Acta*, 2019, **1078**, 168-175.
- 20 T. I. Kim, D. Kim, J. Bouffard, et al., *Sens. Actuat. B Chem.*, 2019, **283**, 458-462.
- 21 L. Yang, Z. Sun, Z. Li, et al., *Anal. Method.*, 2019, **11**, 4600-4608.
- 22 L. Patra, K. Aich, S. Gharami, et al., *Sens. Actuat. B Chem.*, 2021, **326**, 128837-128843.
